# Supplementary material for: Effects of Tai Chi or Exercise on Sleep in Older Adults With Insomnia: A Randomized Clinical Trial
Source: PubMed Central journal article supplement (PMC7885034; doi:10.1001/jamanetworkopen.2020.37199), 2021-02-15
Supplement: jamanetwopen-e2037199-s001.pdf [file jamanetwopen-e2037199-s001.pdf]

# Effects of Tai Chi or exercise on sleep in insomniac older adults: A three-arm randomized controlled trial

## Study Protocol

### Aim

This project aims to examine the efficacy of a 12-week Tai Chi intervention in improving sleep, especially in objective sleep assessed by actigraphy, in insomniac older adults by using a conventional exercise intervention as an active control.

### Our Working Hypothesis

i) sleep outcome measures are significantly improved in insomniac elderly participants after receiving 12 weeks of Tai Chi training; ii) improvement of sleep outcome measures is found in Tai Chi group but not in passive control group; and iii) improvement of sleep outcome measures in Tai Chi group is greater than that in active control group, if any.

### Background

Elderly insomnia is a serious public health problem. It has been estimated over 50% of elderly have sustained sleep complaints<sup>1</sup>. About 20-40% of the elderly worldwide are reported insomniac<sup>2</sup>. In Hong Kong, a high proportion (38%) of older people have been reported to have sleep disorders<sup>3</sup>. These figures are alarming because insomnia associates with co-morbidities including cognitive impairment, depression, mood/anxiety disorders, risks for falls, hypertension, and heart disease in elderly<sup>4</sup>. It also destructively affects daily functioning by impairing the memory and reducing the attention span and response time<sup>2</sup>. Most importantly, insomnia has been evidently shown to link with the increased risk of hospitalization and mortality<sup>5</sup>. As the proportion of geriatric population is rapidly increasing, it is foreseeable that the socioeconomic impact of elderly insomnia to the healthcare system will be undoubtedly aggravated.

Current conventional approaches for treating insomnia are not suitable or effective in elderly population. Pharmacologic treatment has always been a concern in insomniac senior patients due to the adverse drug effects including dependence, abuse, cognitive impairment and increase in risk of falls and hip fractures<sup>6</sup>. With fewer adverse effects and consistent efficacy, cognitive behavioral therapy for insomnia (CBTI) is taken as a more appropriate remedy for elderly insomnia. However, the operation of effective CBTI for insomnia is very labor demanding and cost-ineffective. The large-scale use of CBTI for elderly insomnia is not feasible due to the shortage of CBTI specialty-trained healthcare providers and the high treatment cost. The limited availability of CBTI treatment is far insufficient to match with the increasingly large demand of insomniac elderly. There is another problem with the conventional approaches. It is observed that most of the insomnia sufferers would not seek timely clinical consultation and they tend to initiate self-help treatments when facing the problem of insomnia<sup>7</sup>. This situation is suggested to be more common in Chinese elderly due to the traditional Confucius philosophy of reservation and quietness probably drive them more likely to keep the problem to themselves and become reluctant to seek prompt clinical help until serious medical symptom occurs. Given the prevalence of elderly insomnia is already high and keeps increasing, there is an urgent need to explore other effective therapeutic modalities preferably in forms of self-help remedies that can help to relieve the problem of elderly insomnia.

Tai Chi is a mind-body exercise that was simplified from a traditional form of Chinese martial art. It is a unique form of physical activity of low impact and slow body movement, which includes a meditation component. A number of beneficial effects of Tai Chi on geriatric health and fitness has been demonstrated. These health benefits include improvements of cardiorespiratory system, energy metabolism, immunity, muscular strength and balance<sup>8</sup>. In addition, Tai Chi exercise has been shown to improve psychological well-being via relieving symptoms of anxiety and depression and reducing mood disturbances<sup>8</sup>. Preliminary studies have provided evident that Tai Chi is beneficial in improving sleep in

53 older people. Favorable effects on sleep parameters have been reported in geriatric following 12 weeks to  
54 6 months of Tai Chi training. The self-reported sleep quality is demonstrated to be improved by a 12-week  
55 of Tai Chi intervention in the senior residents in elderly home<sup>9</sup>. Favorable effects of 12-week of Tai Chi  
56 training in patients with chronic heart failure are reported by showing the enhancement of sleep stability  
57 as assessed by electrocardiogram-based sleep spectrogram<sup>10</sup>. A longer period (6-month) of Tai Chi  
58 training has also been shown to improve the Pittsburgh Sleep Quality Index (PSQI)-indicated sleep  
59 quality in community-dwelling older adults<sup>11</sup>. In older participants with moderate sleep complaint or sleep-  
60 disturbance, 24/25-week of Tai Chi training is shown to improve the self-rated sleep quality, habitual  
61 sleep efficiency, sleep duration, and sleep disturbance<sup>12,13</sup>.

62  
63 As a moderate type of exercise that is well perceived to be suitable for regular practice by older  
64 population, Tai Chi has advantages to be developed as self-help therapy of insomnia for older adults. It is  
65 expected that Tai Chi is more acceptable to the elderly patients to be incorporated with their daily life as  
66 an instant approach for remedying insomnia relative to the conventional clinical treatment such as CBTI.  
67 Additional advantages of Tai Chi include low-cost and can be conveniently practiced at any time and any  
68 place without requirement for extensive facilities. Certainly, the practice of Tai Chi is more accessible than  
69 the conventional CBTI treatment, which facilitates the large-scale use of Tai Chi to relieve insomnia in  
70 elderly population. Furthermore, Tai Chi can be practiced individually or in a group. If practicing in a group,  
71 Tai Chi provides additional benefit by serving as a vehicle for establishing social interaction through which  
72 older people can establish friendship and gain supports from other seniors.

73  
74 All these preliminary data collectively indicate the beneficial effects of Tai Chi on improving sleep in  
75 geriatric population. Nonetheless, all these studies have a common design limitation, which is lack of the  
76 direct objective sleep measures. With the study limitation and research gaps, the present project is  
77 proposed to examine the therapeutic effects of Tai Chi on chronic insomnia in elderly by including  
78 objective sleep measures. The findings of this project are expected to have impact to unveil the efficacy  
79 of Tai Chi to alleviate elderly insomnia, which has been an epidemic healthcare problem that necessitates  
80 to be tackled promptly.

81 **Sample Size Estimation**

82 The effect size of Tai Chi intervention in older adults on sleep parameters assessed objectively by  
83 actigraphy or subjectively by 7-day sleep diary were not available by the time the present study was  
84 designed. Thus, the sample size estimation of this study is based on the published data on the effects of  
85 Tai Chi on subjective sleep outcome measures in older people. As this study employed a three-arm  
86 pretest-posttest design, estimation of sample size was originally performed using G\*Power 3.0 by setting  
87 the test family section and statistical test section as “F tests” and “ANOVA: Repeated measures, within-  
88 between interaction”. An interaction effect size’ d 0.22 was calculated based on the subjective sleep  
89 quality of PSQI<sup>12</sup>. With 0.22 as the interaction effect size’ d (i.e. interaction effect size’ f = 0.11), 3 as  
90 number of groups, 2 as number of measurements, the calculation showed that 81 participants is needed  
91 to achieve a statistical power of 80% ( $\alpha = 0.05$ ). The estimated sample size can be further justified by  
92 using a previously reported SMD in a systematic review study conducted by Sarris and Byrne, in which  
93 the modified cohen’s d of improvement in PSQI-assessed subjective sleep quality after Tai Chi  
94 intervention was 0.44.<sup>14</sup> The sample size estimation by using standardized mean difference as 0.44 in a  
95 two-tailed head-to-head test between two groups with  $\alpha = 0.05$  and power = 0.80, 83 participants per  
96 group is needed for a statistical power of 80% ( $\alpha = 0.05$ ).

97  
98 **Participants**

99 This study examines the efficacy of Tai Chi intervention on alleviating chronic insomnia in older adults by  
100 examining both objective and subjective sleep quality. Participants will be recruited via poster and leaflet  
101 distribution to community centers, elderly daycare centers, local universities, and large housing estates.

102  
103 Inclusion Criteria of this study are: (1) be 60 years or older; (2) ethnic Chinese; (3) fulfill the Fifth Edition of  
104 *Diagnostic and Statistical Manual of Mental Disorders (DSM-5)* criteria for chronic insomnia including A)

105 manifestation of predominant, subpar sleep quantity or quality, B) exhibition of any sleep difficulties  
106 ranging from sleep initiation, sleep maintenance to early awakening with the inability in sleep restoration,  
107 C) concomitant presentation of significant distress or impairment, including fatigue or low energy,  
108 cognitive impairment, mood disturbance, behavioral problems, impaired occupational or academic  
109 functioning, impaired interpersonal or social functioning and negative impact on caregiver or family  
110 functioning, D) sleep difficulty occurs at least three nights per week, E) sleep difficulty has been persistent  
111 for at least three months, and F) sleep difficulty is not affected regardless of adequate opportunity given  
112 for sleep. Notably, this study intends to include the elderly suffered from all types of insomnia in order to  
113 enhance the generalizability and practical implication of our results.

114  
115 Exclusion Criteria are set to exclude participants that are incapable to participate Tai Chi/conventional  
116 exercise and have major confounding conditions which are known to affect sleep. Exclusion criteria  
117 include: (1) cannot walk without assistive tool (e.g., cane); (2) any serious somatic condition that prevent  
118 participation for Tai Chi/conventional exercise activities; (3) current regular practicing of moderate  
119 exercise training or Tai Chi (>3 times a week of >30-min per session); (4) any serious chronic diseases  
120 known to affect sleep (e.g., cancer and autoimmune diseases); (5) under treatment of serious diseases  
121 known to affect sleep (e.g., cancer chemotherapy); (6) any chronic pain disorders known to affect sleep.  
122 Participants who are on sleep medications will not be excluded to increase the practical value of this  
123 study.

## 124 125 **Study Design**

### 126 Participant Screening

127 Participants who respond to our advertisements/promotion activities will undergo our screening process  
128 to confirm their eligibility for the study (i.e., older adults with chronic insomnia according to the DSM-5  
129 criteria and do not fall into any exclusion criteria). Participants showing interest in participating in the  
130 study will be initially screened by brief self-reported questionnaires on their sleep and brief medical history  
131 via telephone. Potential participants will then be invited to attend a comprehensive in-person interview  
132 which includes diagnosis of chronic insomnia and comprehensive questionnaires to further obtain detailed  
133 sleep and medical history. Our research personnel will provide face-to-face explanation and assistance to  
134 the elderly participants in completing the questionnaires. Written informed consent will be obtained from  
135 all participants prior to the in-person interview. The interview will serve the purpose to obtain information  
136 to diagnose patients with chronic insomnia according to the DSM-5 criteria and to document the history of  
137 sleep-related abnormalities (e.g., apnea) and the use of sleep medications. Our clinical co-investigator  
138 plays a key consulting role in the interview supervision of the study. If there are any doubtful cases during  
139 the process of participant recruitment, decision is made based on the consultation with the clinical co-  
140 investigator.

### 141 142 Randomization and Masking

143 Eligible participants are randomly assigned to passive control (CON), active control (conventional  
144 exercise), or Tai Chi intervention. Randomization sequences are generated by using an automated  
145 permuted block algorithm with a block size of 30. Results of group allocation for the 30 participants will be  
146 respectively sealed in an envelope by an independent researcher. The envelopes will then be passed to  
147 the researcher who is responsible for participant enrollment. The envelopes that contained the group  
148 allocation results will not be opened until the participant enrollment process, thus concealing the  
149 randomized group allocation sequence from the researcher who is responsible for participant. During the  
150 recruitment process, the researcher who is responsible for participant enrollment will open an envelope in  
151 the chronological order and allocate each given eligible participant according to the randomization result  
152 enclosed. The same researcher will also be responsible to make appointments with the participants and  
153 the outcome assessors for taking the required measurements at each assessment time point. The  
154 allocated group of the participants will not be disclosed to the outcome assessors. Participants will be  
155 reminded not to disclose their group allocation to the outcome assessors such that the data collection  
156 process will be blinded.

### 157 158 Outcome Measures

159 In this study, the outcome measures will be conducted at baseline assessment (before intervention), post  
160 assessment (immediately after the completion of 12 weeks intervention), and follow up assessment (24  
161 months after the end of intervention). Eligible participants will be invited to complete the baseline  
162 assessment and start the intervention no more than four weeks after the in-person interview.

163

### 164 **Primary Outcome Measure**

#### 165 *7-Day Actigraphy*

166 Wrist actigraph (wGT3X-BT, Actigraph) will be used to objectively estimate sleep as movement and lack  
167 of movement correlate with wakefulness and sleep, respectively. This is a waterproof watch-like device  
168 that records physical movement by means of an accelerometer Participants will be instructed to wear our  
169 provided actigraph on the non-dominant wrist for 24-hour x 7 days. Actigraphy data will be extracted after  
170 the participants return the actigraph and a software provided by the manufacturer (ActilifeV6.11.7) will be  
171 used to analyze the data by sleep efficiency (total sleep time / total time in bed x 100%), wake time after  
172 sleep onset, number of awakenings per night, sleep onset latency, total sleep time, and average wake  
173 time per awakening.

174

### 175 **Secondary Outcome Measures**

#### 176 *7-Day Sleep Diary*

177 Participants will be instructed to record their sleep pattern each morning for 7-day at all assessment time  
178 points in a provided sleep log that consists of questions to obtain information including bedtime, sleep  
179 rising time, wake time after sleep onset, total sleep time, number of awakenings, and sleep onset latency.  
180 Sleep efficiency will be estimated by (total sleep time / total time in bed) x 100%. Average awaken time  
181 will be estimated by (wake time after sleep onset / number of awakenings). Notably, the sleep diary has  
182 been shown to be a reliable instrument for collecting data about sleep/wake patterns, although it is a  
183 participative measure <sup>15</sup>. An acceptable percentage agreement between the sleep diaries data and  
184 polysomnographic data (kappa = 0.87) has been demonstrated previously <sup>15</sup>.

185

#### 186 *Usage of Sleep Medication*

187 The dosage and frequency of sleep aid medications such as narcotics, antihistamines (diphenhydramine),  
188 benzodiazepines (e.g., flurazepam, quazepam, triazolam, estazolam, temazepam, clonazepam,  
189 lorazepam, alprazolam, etc), and non-benzodiazepine, benzodiazepine receptor agonists (e.g., zolpidem,  
190 zaleplon, eszopiclone, etc) will be recorded in the 7-Day Sleep Diary.

191

#### 192 *Pittsburgh Sleep Quality Index (PSQI)*

193 Pittsburgh Sleep Quality Index (PSQI) is a standardized instrument to estimate sleep quantity and quality.  
194 There are 19 items subjectively assessing sleep quantity and the perceived restfulness and disturbance  
195 of sleep by gathering information on usual bed time, wake time, time to fall asleep, time of actual sleep,  
196 and quality of sleep. Each item is rated on a "0-3" Likert scale, with higher score indicating poorer sleep  
197 quality. PSQI has been commonly used to discriminate people with normal sleep from those with primary  
198 insomnia. The Chinese version of PSQI will be used in this study. This Chinese version PSQI has been  
199 demonstrated to have satisfactory Cronbach's alpha of 0.82-0.83 and test-retest reliability of 0.85 and has  
200 been adopted to study insomnia in Hong Kong Chinese older adults<sup>16</sup>.

201

#### 202 *Insomnia Severity Index (ISI)*

203 The Insomnia Severity Index (ISI) questionnaire will be used to measure the perceived insomnia severity.  
204 There are 7 items on the aspects of insomnia to be measured by this instrument and these include sleep-  
205 onset and sleep maintenance difficulties, satisfaction with the current sleep pattern, interference with daily  
206 functioning, noticeability of impairment due to sleep problems, degree of distress, and concern caused by  
207 sleep problems. Each item is rated on a "0-3" Likert scale, with higher score indicating more perceived  
208 severity of insomnia. The Chinese version ISI has been shown to have satisfactory content valid index of  
209 0.94 and high internal consistency with Cronbach's alpha of 0.81<sup>17</sup>. This Chinese version ISI has been  
210 demonstrated to be culturally relevant and psychometrically sound instrument for examining severity and  
211 impact of insomnia in Hong Kong Chinese older people <sup>17</sup>.

212

#### 213 *Insomnia Remission Rate*

214 Participants will undergo diagnosis of chronic insomnia at the post assessment and follow up assessment  
215 by a blinded assessor. Participants who are not meeting the DSM-5 criteria of chronic insomnia will be  
216 considered to reach remission from chronic insomnia.

217

#### 218 *Treatment Response*

219 Treatment response is defined by a decrease in PSQI by at least 5 points, which indicates marked  
220 improvement or nearly complete or complete remission of insomnia symptoms. Treatment response will  
221 be measured at the post assessment and follow up assessment.

222

#### 223 Intervention

##### 224 *Passive Control Group*

225 Participants in CON received no intervention but monthly phone calls for recording the sleep conditions.  
226 These participants will be asked to continue their pre-existing usual care throughout the study period.

227

##### 228 *Active Control Group*

229 Intervention of low-to-moderate intensity conventional exercise will be given to participants in active  
230 control group. Participants assigned to active control group are arranged with a conventional exercise  
231 training program conducted in small group (~13 participants with both males and females per class).  
232 Conventional exercise training is prescribed as a 12-week program, with three 1-hour instructor-led  
233 sessions per week. The conventional exercise classes are operated by certified fitness instructors. The 1-  
234 hour training session consists of 15-minute light static stretching exercises on major muscles, 15 to 20  
235 minutes of body conditioning activities (e.g., arm curl, arm raise, should press, ¼ squat, heel raise and  
236 stepping on the ground), 15-minute walking or brisk walking exercise, and 10 to 15 minutes of cool down  
237 exercise (i.e. static stretching, deep breathing, and relaxing body movements). According to The  
238 Compendium of Physical Activities<sup>18</sup>, the exercise intensity level of stretching exercise (PA code: 02101)  
239 is approximate to 2.3 metabolic equivalent (MET; 1 MET refers to the resting metabolic rate during quiet  
240 sitting, i.e., energy expenditure of 1 kcal or 4.184 kJ per kg body weight per hour), conditioning exercise  
241 with moderate effort (PA code: 02035) is approximate to 4.3 METs, walking with moderate pace (PA code:  
242 17190) is approximate to 3.5, brisk walking (PA code: 17200) is approximate to 4.3 METs. To ensure the  
243 body exercise movements are practicable and safe particularly to elderly participants, all movements are  
244 kept simple and no additional weight is applied. Range of motion and numbers of repetition/set are  
245 adjusted for the ease of participants. The recruited fitness instructors will have to attend a briefing session  
246 to ensure that they understand the exact procedure of the conventional exercise intervention protocol.  
247 This training session is to make sure all fitness instructors are delivering the same fitness protocol  
248 throughout the study. Research personnel will occasionally visit the classes to monitor the fidelity of  
249 treatment protocol in the study.

250

251 The purpose of the active control group is to control for the effects of social gathering and moderate-  
252 intensity physical activity that would be parts of the Tai Chi treatment program. Interpretations are made  
253 based on the comparison between Tai Chi intervention and the two control groups (i.e., active and  
254 passive control groups). With the active control (conventional exercise) group, our study will be able to  
255 examine the specific effects of Tai Chi training itself by eliminating the factors such as group gathering,  
256 interactions among participants and with the class instructor, generic moderate-intensity physical activity,  
257 and the other factors resulting from operation of a small-group interventional program. Furthermore, this  
258 study design can also help to distinguish the specific effects of the “mind” component of Tai Chi (which is  
259 a mind-body exercise) by comparing the results obtained from Tai Chi group to the active control  
260 (conventional exercise) group in our project. Moreover, comparison made between Tai Chi and passive  
261 control groups will demonstrate the overall treatment effects of Tai Chi training when compared to “no  
262 intervention”. This comparison will demonstrate the effects of Tai Chi intervention over “no intervention”,  
263 which will be valuable in providing evidence for recommending Tai Chi as a therapeutic tool to physically  
264 sedentary elderly population.

265

##### 266 *Tai Chi Intervention Group*

267 For the participants assigned to Tai Chi group, they will be arranged with a Tai Chi training program  
268 conducted in small group (~13 participants with both males and females per class). Tai Chi intervention is

269 prescribed as a 12-week program, with three 1-hour instructor-led sessions per week. The Tai Chi  
270 classes are operated by qualified/certified instructors. Each 1-hour training session consists of a brief  
271 warm-up stretching session followed by standard Tai Chi routine activities. The 24-form/movement  
272 simplified Yang style Tai Chi is adopted as it is the most popular form of Tai Chi <sup>11</sup>. The 24-  
273 form/movement simplified Yang style Tai Chi is adopted to reduce the complexity and time required and  
274 hence people could learn to practice within a relatively short period of time. This Yang style Tai Chi is  
275 suitable for most people including elderly to practice as it has been commonly adopted for older  
276 participants in the literature <sup>11,19</sup>. Similar to the conventional exercise, the Yang style Tai Chi is considered  
277 as a moderate-intensity exercise, with the metabolic expenditure approximate to 3.24 METs <sup>20</sup>. The  
278 recruited Tai Chi instructors will have to attend a briefing session to ensure that they understand the exact  
279 procedure of the Tai Chi intervention protocol. This training session is to make sure all Tai Chi instructors  
280 are delivering the same intervention protocol throughout the study. Research personnel will occasionally  
281 visit the Tai Chi classes to monitor the fidelity of treatment protocol in the study.  
282

#### 283 Venue for Tai Chi and Conventional Exercise Classes

284 Tai Chi and conventional exercise classes will be conducted in the open space areas of public  
285 recreational parks. In this study, public parks equipped with both open space and cover areas are  
286 selected. In case of inclement weather, classes will be moved to the cover areas of the same parks. Most  
287 of the classes will be conducted in the open space areas of the park except those on the days of  
288 inclement weather, which will be conducted in the cover area of the parks. The comparison made  
289 between Tai Chi and conventional exercise (active control) groups should be valid because the same set  
290 of venue arrangement for weather condition will be applied to both groups.  
291

#### 292 Plan to Emphasize Safety Issue

293 A compulsory safety briefing session will be arranged in the first class of Tai Chi and conventional  
294 exercise groups. In briefing session, safety precaution topic including safe training environment, safety  
295 regulation in the class, and response to emergency situation. Safety issues will be reinforced to  
296 instructors throughout the study.  
297

#### 298 Plan to Monitor Adverse Event

299 Adverse events will be monitored through reports from Tai Chi and fitness instructors, reports from  
300 participants. Instructors will be asked to fill a logbook after each of the Tai Chi/conventional exercise class  
301 to record any adverse events (such as falls or slips, fatigue, dizziness, headache, and knee strain injury,  
302 etc) indicated by participants that might be related to Tai Chi and conventional exercise training. Research  
303 personnel will contact the participants by telephone in Tai Chi group and conventional exercise group  
304 monthly to ask if they have any adverse events or safety issues that are related to their participation in the  
305 study. If sustained serious adverse events are found, clinical advice will be sought from our medical and  
306 nursing co-investigators.  
307

#### 308 Plan to Have Blind Outcome Assessor

309 The data collection for aforementioned outcome measures will be performed by the research personnel. It  
310 is noted that the front pages of all the questionnaires and sleep data record forms will display the names  
311 of participants for the research personnel and instructors to conduct the data collection. After the  
312 questionnaires and forms are collected from all groups at the beginning and the end of each of the  
313 sessions, all questionnaires and forms will go to the office of the Principal Investigator. The PI will then  
314 replace the participant name by a randomized code on the front pages of the questionnaires and forms.  
315 The participant identity of these codes will only be known to the PI but not the others during the process  
316 of data assessments which will be performed by other research personnel. The participant identity of the  
317 codes will finally be disclosed to the research personnel after the completion of the data assessments.  
318 This practice will ensure that the outcome assessors will be blinded to the group assignment of the data  
319 during assessments in order to avoid bias. Participants will be reminded not to disclose their received  
320 intervention to the assessors during the assessments.  
321

#### 322 **Data Analysis**

323 Data will be expressed as mean (standard deviation). Intention-to-treat analysis will be employed.  
324 Generalized estimated equation model with baseline measurement as covariate will be used to analyze  
325 the quantitative data. Pairwise comparison will be performed using closed test procedure with Holm-  
326 Bonferroni correction to detect statistical differences among groups. A sub-group analysis will be  
327 conducted in participants taking hypnotic medication to examine changes in hypnotic medication usage.  
328 Logistic regression will be performed to examine categorical data, followed by linear contracting for  
329 pairwise comparison analysis. All statistical analyses will be performed using R. Statistical significance  
330 will be accepted at  $p < 0.05$ .

331

### 332 **References**

- 333 1. Foley DJ, Monjan AA, Brown SL, Simonsick EM, Wallace RB, Blazer DG. Sleep complaints  
334 among elderly persons: an epidemiologic study of three communities. *Sleep*. 1995;18(6):425-432.
- 335 2. Schubert CR, Cruickshanks KJ, Dalton DS, Klein BE, Klein R, Nondahl DM. Prevalence of sleep  
336 problems and quality of life in an older population. *Sleep*. 2002;25(8):889-893.
- 337 3. Chiu HF, Leung T, Lam LC, et al. Sleep problems in Chinese elderly in Hong Kong. *Sleep*.  
338 1999;22(6):717-726.
- 339 4. Stewart R, Besset A, Bebbington P, et al. Insomnia comorbidity and impact and hypnotic use by  
340 age group in a national survey population aged 16 to 74 years. *Sleep*. 2006;29(11):1391-1397.
- 341 5. Manabe K, Matsui T, Yamaya M, et al. Sleep patterns and mortality among elderly patients in a  
342 geriatric hospital. *Gerontology*. 2000;46(6):318-322.
- 343 6. Glass J, Lanctot KL, Herrmann N, Sproule BA, Busto UE. Sedative hypnotics in older people with  
344 insomnia: meta-analysis of risks and benefits. *BMJ*. 2005;331(7526):1169.
- 345 7. Morin CM, LeBlanc M, Daley M, Gregoire JP, Merette C. Epidemiology of insomnia: prevalence,  
346 self-help treatments, consultations, and determinants of help-seeking behaviors. *Sleep Med*.  
347 2006;7(2):123-130.
- 348 8. Wang C, Collet JP, Lau J. The effect of Tai Chi on health outcomes in patients with chronic  
349 conditions: a systematic review. *Arch Intern Med*. 2004;164(5):493-501.
- 350 9. Hosseini H, Esfirizi MF, Marandi SM, Rezaei A. The effect of Ti Chi exercise on the sleep quality  
351 of the elderly residents in Isfahan, Sadeghieh elderly home. *Iranian journal of nursing and*  
352 *midwifery research*. 2011;16(1):55-60.
- 353 10. Yeh GY, Mietus JE, Peng CK, et al. Enhancement of sleep stability with Tai Chi exercise in  
354 chronic heart failure: preliminary findings using an ECG-based spectrogram method. *Sleep Med*.  
355 2008;9(5):527-536.
- 356 11. Nguyen MH, Kruse A. A randomized controlled trial of Tai chi for balance, sleep quality and  
357 cognitive performance in elderly Vietnamese. *Clinical interventions in aging*. 2012;7:185-190.
- 358 12. Irwin MR, Olmstead R, Motivala SJ. Improving sleep quality in older adults with moderate sleep  
359 complaints: A randomized controlled trial of Tai Chi Chih. *Sleep*. 2008;31(7):1001-1008.
- 360 13. Li F, Fisher KJ, Harmer P, Irbe D, Tearse RG, Weimer C. Tai chi and self-rated quality of sleep  
361 and daytime sleepiness in older adults: a randomized controlled trial. *J Am Geriatr Soc*.  
362 2004;52(6):892-900.
- 363 14. Sarris J, Byrne GJ. A systematic review of insomnia and complementary medicine. *Sleep Med*  
364 *Rev*. 2011;15(2):99-106.
- 365 15. Rogers AE, Caruso CC, Aldrich MS. Reliability of sleep diaries for assessment of sleep/wake  
366 patterns. *Nurs Res*. 1993;42(6):368-372.
- 367 16. Tsai PS, Wang SY, Wang MY, et al. Psychometric evaluation of the Chinese version of the  
368 Pittsburgh Sleep Quality Index (CPSQI) in primary insomnia and control subjects. *Qual Life Res*.  
369 2005;14(8):1943-1952.
- 370 17. Yu DS. Insomnia Severity Index: psychometric properties with Chinese community-dwelling older  
371 people. *J Adv Nurs*. 2010;66(10):2350-2359.
- 372 18. Ainsworth BE, Haskell WL, Herrmann SD, et al. 2011 Compendium of Physical Activities: A  
373 Second Update of Codes and MET Values. *Medicine & Science in Sports & Exercise*.  
374 2011;43(8):1575-1581.
- 375 19. Lee MS, Lee EN, Kim JI, Ernst E. Tai chi for Lowering Resting Blood Pressure in the Elderly: a  
376 Systematic Review. *J Eval Clin Pract*. 2010;16(4):818-824.

- 377 20. Hui SS, Woo J, Kwok T. Evaluation of energy expenditure and cardiovascular health effects from  
378 Tai Chi and walking exercise. *Hong Kong Med J.* 2009;15 Suppl 2:4-7.  
379
