# Supplementary material for: Effects of Tai Chi or Exercise on Sleep in Older Adults With Insomnia: A Randomized Clinical Trial
Source: PubMed Central journal article supplement (PMC7885034; doi:10.1001/jamanetworkopen.2020.37199), 2021-02-15
Supplement: jamanetwopen-e2037199-s003.pdf [file jamanetwopen-e2037199-s003.pdf]

## Data Sharing Statement

### Data

**Data available:** Yes

**Data types:** Deidentified participant data

**How to access data:** Individual participant data used in the reported results have been de-identified (text, tables, and figures). The data, study protocol, and the statistical analysis plan will be shared beginning 3 months and ending 5 years following the publication of this Article. Data will be shared with researchers who provide a methodologically sound proposal with achievable aims. Proposals should be directed to [pmsiu@hku.hk](mailto:pmsiu@hku.hk), and those requesting access to the data will need to sign a data-access agreement.

**When available:** With publication

### Supporting Documents

**Document types:** None

### Additional Information

**Who can access the data:** Data will be shared with researchers who provide a methodologically sound proposal with achievable aims.

**Types of analyses:** Data will be shared with researchers who provide a methodologically sound proposal with achievable aims.

**Mechanisms of data availability:** Proposals should be directed to [pmsiu@hku.hk](mailto:pmsiu@hku.hk), and those requesting access to the data will need to sign a data-access agreement.
